# Supplementary material for: Can spatial patterns along climatic gradients predict ecosystem responses to climate change? Experimenting with reaction-diffusion simulations
Source: PLoS One. 2017 Apr 10;12(4):e0174942. doi: 10.1371/journal.pone.0174942 (PMC5386256; doi:10.1371/journal.pone.0174942)
Supplement: S1 Appendix — Table A in S1 Appendix. Parameters for the RDE model as adapted from Rietkerk (2002) (DOCX) [file pone.0174942.s001.docx]

**S1 Appendix: Reaction-Diffusion Model Equations**

|  |  |
| --- | --- |
|  |  |
|  |  |

**Table A. Parameters for the RDE model as adapted from Rietkerk (2002).**

| Parameter | Description | |
| --- | --- | --- |
|  | Plant dispersal | |
|  | | Diffusion coefficient for soil water |
|  | | Diffusion coefficient for surface water |
| *O* [*mm* ] | | Surface water |
| *P* [] | | Plant density |
|  | | Rainfall (ranged between 0 to 3) |
| *W* [*mm*] | | Soil water |
|  | | Water infiltration rate in absence of plants |
|  | | Conversion of water uptake by plants to plant growth |
|  | | Specific loss of plant density due to mortality |
|  | | Maximum specific water uptake |
|  | | Half-saturation constant of specific plant growth and water uptake |
|  | | Saturation constant of water infiltration |
|  | | Specific soil water loss due to evaporation and drainage |
|  | | Maximum infiltration rate |
